# Supplementary material for: Evolution and ecology of Jeilongvirus among wild rodents and shrews in Singapore
Source: PubMed Central journal article supplement (PMC10726567; doi:10.1186/s42522-023-00094-1), 2023-12-18
Supplement: 42522_2023_94_MOESM1_ESM.pdf [file 42522_2023_94_MOESM1_ESM.pdf]

## Additional Figure 1

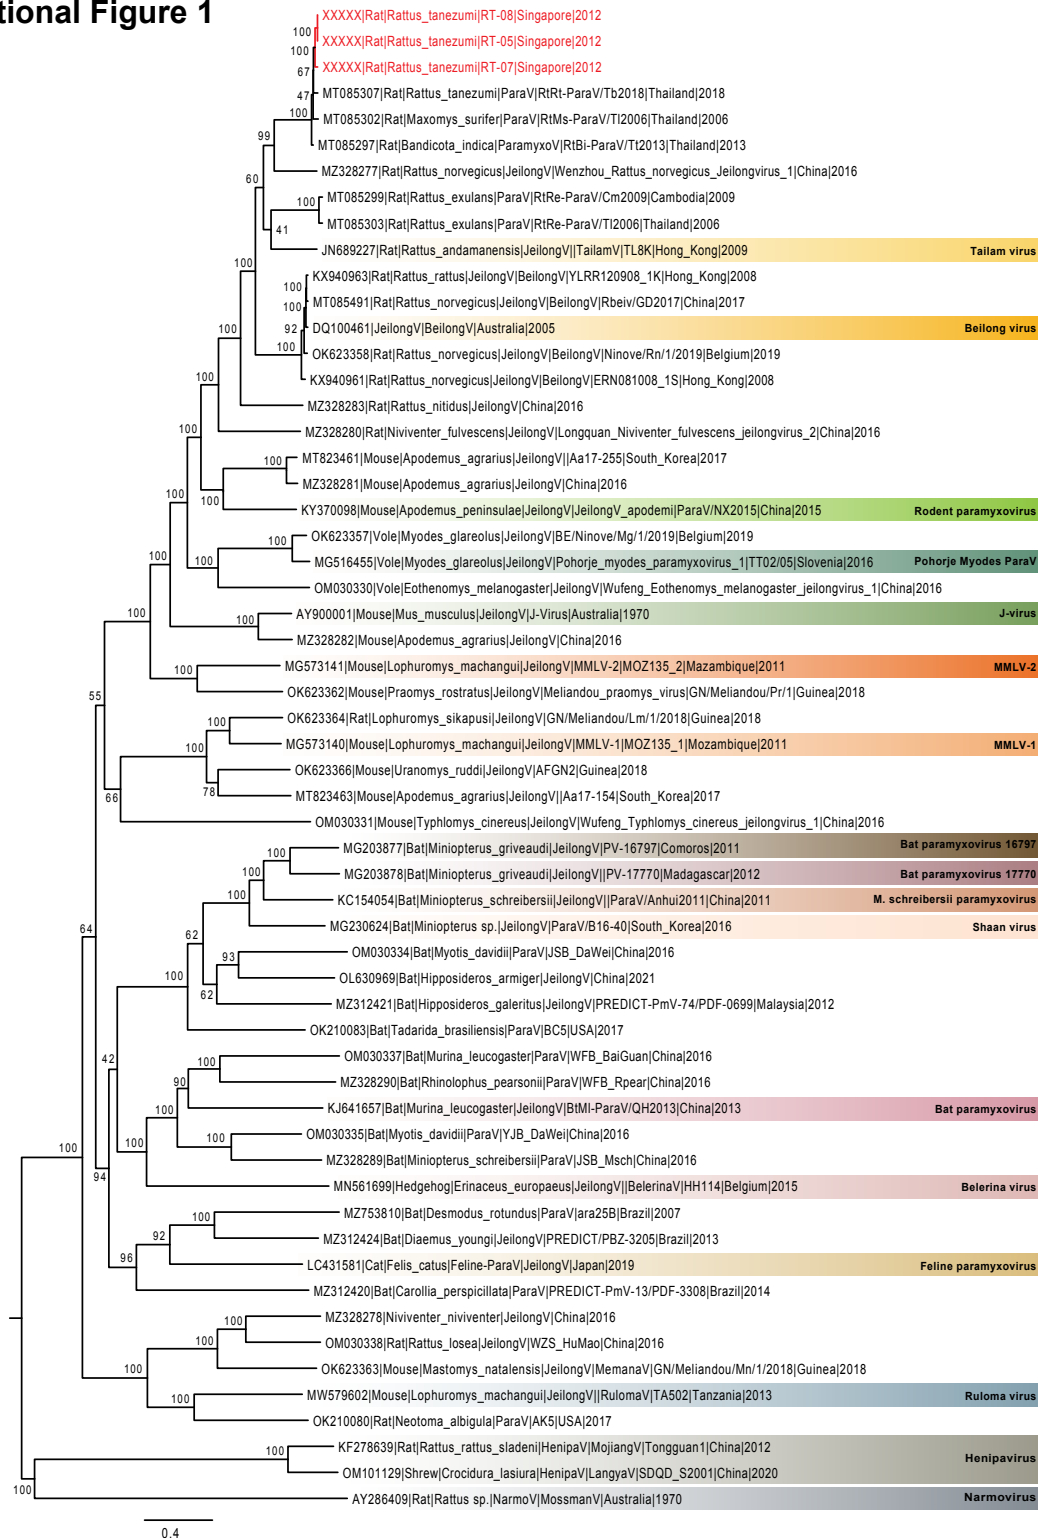

Maximum likelihood phylogeny of full Jeilongvirus genomes generated using the GTR + GAMMA model in RaxML. Coloured taxa represent exemplar Jeilongvirus species. Red fonts indicate novel genomes generated from *Rattus tanezumi* in this study. Bootstrap values greater than 70% are indicated at branch nodes. The scale bar denotes nucleotide substitutions per site.
