# Supplementary material for: Evolution and ecology of Jeilongvirus among wild rodents and shrews in Singapore
Source: PubMed Central journal article supplement (PMC10726567; doi:10.1186/s42522-023-00094-1), 2023-12-18
Supplement: 42522_2023_94_MOESM2_ESM.pdf [file 42522_2023_94_MOESM2_ESM.pdf]

**Additional Table 1.** Metadata for captured small mammal individuals used for this study.

| Sample ID | Species                    | Year of Collection | District   | Location                | Habitat Type | Age      | Sex     |
|-----------|----------------------------|--------------------|------------|-------------------------|--------------|----------|---------|
| RE-01     | <i>Rattus exulans</i>      | 2012               | Central    | Bukit Merah             | Young Forest | Adult    | Male    |
| RE-02     | <i>Rattus exulans</i>      | 2015               | East       | Pasir Ris               | Young Forest | Adult    | Male    |
| RTIO-01   | <i>Rattus tiomanicus</i>   | 2012               | West       | Choa Chu Kang           | Scrub        | Juvenile | Female  |
| RTIO-02   | <i>Rattus tiomanicus</i>   | 2012               | West       | Choa Chu Kang           | Scrub        | Juvenile | Female  |
| RTIO-03   | <i>Rattus tiomanicus</i>   | 2012               | West       | Choa Chu Kang           | Scrub        | Adult    | Male    |
| TG-01     | <i>Tupaia glis</i>         | 2011               | West       | Bukit Panjang           | Scrub        | Adult    | Male    |
| TG-02     | <i>Tupaia glis</i>         | 2012               | West       | Bukit Panjang           | Old Forest   | Adult    | Female  |
| TG-03     | <i>Tupaia glis</i>         | 2012               | West       | Bukit Panjang           | Old Forest   | Adult    | Female  |
| TG-04     | <i>Tupaia glis</i>         | 2012               | West       | Choa Chu Kang           | Scrub        | Adult    | Female  |
| TG-05     | <i>Tupaia glis</i>         | 2013               | West       | Bukit Panjang           | Old Forest   | Adult    | Male    |
| TG-06     | <i>Tupaia glis</i>         | 2013               | West       | Bukit Panjang           | Old Forest   | Adult    | Female  |
| RN-01     | <i>Rattus norvegicus</i>   | 2012               | Central    | Outram                  | Urban        | Unknown  | Unknown |
| RN-02     | <i>Rattus norvegicus</i>   | 2012               | East       | Pasir Ris               | Urban        | Juvenile | Female  |
| RN-03     | <i>Rattus norvegicus</i>   | 2012               | East       | Pasir Ris               | Urban        | Adult    | Male    |
| RN-04     | <i>Rattus norvegicus</i>   | 2012               | Central    | Toa Payoh               | Urban        | Adult    | Female  |
| RN-05     | <i>Rattus norvegicus</i>   | 2012               | Central    | Toa Payoh               | Urban        | Adult    | Female  |
| RN-06     | <i>Rattus norvegicus</i>   | 2012               | Central    | Outram                  | Urban        | Adult    | Male    |
| RN-07     | <i>Rattus norvegicus</i>   | 2012               | East       | Pasir Ris               | Urban        | Adult    | Female  |
| RN-08     | <i>Rattus norvegicus</i>   | 2012               | Central    | Outram                  | Urban        | Adult    | Male    |
| RN-09     | <i>Rattus norvegicus</i>   | 2012               | Central    | Newton                  | Urban        | Adult    | Female  |
| RN-10     | <i>Rattus norvegicus</i>   | 2012               | Central    | Bukit Merah             | Young Forest | Adult    | Male    |
| RN-11     | <i>Rattus norvegicus</i>   | 2012               | Central    | Bukit Merah             | Young Forest | Adult    | Female  |
| RN-12     | <i>Rattus norvegicus</i>   | 2012               | Unknown    | Unknown                 | Unknown      | Adult    | Female  |
| RN-13     | <i>Rattus norvegicus</i>   | 2014               | North      | Central Water Catchment | Urban        | Juvenile | Male    |
| RN-14     | <i>Rattus norvegicus</i>   | 2014               | North      | Central Water Catchment | Urban        | Adult    | Female  |
| RN-15     | <i>Rattus norvegicus</i>   | 2016               | North      | Sembawang               | Young Forest | Adult    | Female  |
| RN-16     | <i>Rattus</i> sp.          | 2016               | North-East | Punggol                 | Urban        | Adult    | Male    |
| RN-17     | <i>Rattus norvegicus</i>   | 2016               | North      | Sembawang               | Young Forest | Adult    | Female  |
| RN-18     | <i>Rattus norvegicus</i>   | 2016               | North      | Sembawang               | Young Forest | Adult    | Female  |
| RN-19     | <i>Rattus norvegicus</i>   | 2016               | North      | Sembawang               | Young Forest | Adult    | Female  |
| RN-20     | <i>Rattus norvegicus</i>   | 2016               | North      | Sembawang               | Young Forest | Adult    | Female  |
| RN-21     | <i>Rattus norvegicus</i>   | 2016               | North      | Sembawang               | Young Forest | Adult    | Male    |
| RA-01     | <i>Sundamys annandalei</i> | 2011               | West       | Bukit Panjang           | Jungle Fall  | Adult    | Female  |

|       |                     |      |            |                         |              |          |         |
|-------|---------------------|------|------------|-------------------------|--------------|----------|---------|
| RA-02 | Sundamys annandalei | 2011 | West       | Bukit Panjang           | Old Forest   | Juvenile | Male    |
| RA-03 | Sundamys annandalei | 2011 | West       | Bukit Panjang           | Old Forest   | Adult    | Male    |
| RA-04 | Sundamys annandalei | 2011 | West       | Bukit Panjang           | Old Forest   | Adult    | Male    |
| RA-05 | Sundamys annandalei | 2012 | West       | Bukit Panjang           | Old Forest   | Juvenile | Female  |
| RA-06 | Sundamys annandalei | 2012 | North      | Central Water Catchment | Old Forest   | Adult    | Male    |
| RA-07 | Sundamys annandalei | 2012 | North      | Central Water Catchment | Old Forest   | Adult    | Female  |
| RA-08 | Sundamys annandalei | 2012 | West       | Bukit Panjang           | Old Forest   | Adult    | Male    |
| RA-09 | Sundamys annandalei | 2013 | North      | Central Water Catchment | Old Forest   | Adult    | Female  |
| RA-10 | Sundamys annandalei | 2013 | North      | Central Water Catchment | Old Forest   | Adult    | Female  |
| RA-11 | Sundamys annandalei | 2013 | North      | Central Water Catchment | Old Forest   | Adult    | Female  |
| RA-12 | Sundamys annandalei | 2013 | West       | Bukit Panjang           | Old Forest   | Adult    | Female  |
| RA-13 | Sundamys annandalei | 2013 | North      | Central Water Catchment | Old Forest   | Adult    | Male    |
| RA-14 | Sundamys annandalei | 2013 | North      | Central Water Catchment | Old Forest   | Juvenile | Female  |
| RA-15 | Sundamys annandalei | 2013 | West       | Bukit Panjang           | Jungle Fall  | Adult    | Male    |
| RT-01 | Rattus tanezumi     | 2012 | Central    | Outram                  | Young Forest | Adult    | Male    |
| RT-02 | Rattus tanezumi     | 2012 | Central    | Outram                  | Young Forest | Juvenile | Female  |
| RT-03 | Rattus tanezumi     | 2012 | Central    | Queenstown              | Young Forest | Adult    | Male    |
| RT-04 | Rattus tanezumi     | 2012 | North-East | Punggol                 | Scrub        | Adult    | Male    |
| RT-05 | Rattus tanezumi     | 2012 | Central    | Outram                  | Young Forest | Adult    | Male    |
| RT-06 | Rattus tanezumi     | 2012 | West       | Choa Chu Kang           | Scrub        | Adult    | Male    |
| RT-07 | Rattus tanezumi     | 2012 | West       | Choa Chu Kang           | Scrub        | Adult    | Female  |
| RT-08 | Rattus tanezumi     | 2012 | Central    | Outram                  | Young Forest | Adult    | Female  |
| RT-09 | Rattus tanezumi     | 2012 | Central    | Bukit Merah             | Young Forest | Juvenile | Male    |
| RT-10 | Rattus tanezumi     | 2012 | Central    | Outram                  | Young Forest | Adult    | Female  |
| RT-11 | Rattus tanezumi     | 2012 | Central    | Outram                  | Urban        | Unknown  | Unknown |
| RT-12 | Rattus tanezumi     | 2012 | Central    | Outram                  | Urban        | Adult    | Male    |
| RT-13 | Rattus tanezumi     | 2012 | North-East | Punggol                 | Scrub        | Adult    | Male    |
| RT-14 | Rattus tanezumi     | 2012 | Central    | Outram                  | Young Forest | Juvenile | Male    |
| RT-15 | Rattus tanezumi     | 2013 | North-East | Hougang                 | Young Forest | Juvenile | Male    |
| RT-16 | Rattus tanezumi     | 2013 | North      | Central Water Catchment | Urban        | Adult    | Male    |
| RT-17 | Rattus tanezumi     | 2013 | North-East | Pulau Ubin              | Young Forest | Adult    | Male    |
| RT-18 | Rattus tanezumi     | 2013 | North-East | Pulau Ubin              | Urban        | Adult    | Female  |
| RT-19 | Rattus tanezumi     | 2013 | North      | Sembawang               | Young Forest | Adult    | Male    |

|       |                 |      |            |                         |              |          |        |
|-------|-----------------|------|------------|-------------------------|--------------|----------|--------|
| RT-20 | Rattus tanezumi | 2013 | North-East | Pulau Ubin              | Urban        | Juvenile | Female |
| RT-21 | Rattus tanezumi | 2013 | North-East | Pulau Ubin              | Urban        | Adult    | Female |
| RT-22 | Rattus tanezumi | 2013 | Central    | Bukit Timah             | Young Forest | Juvenile | Male   |
| RT-23 | Rattus tanezumi | 2013 | North-East | Pulau Ubin              | Young Forest | Adult    | Female |
| RT-24 | Rattus tanezumi | 2013 | North-East | Pulau Ubin              | Young Forest | Adult    | Male   |
| RT-25 | Rattus tanezumi | 2014 | North      | Central Water Catchment | Urban        | Adult    | Male   |
| RT-26 | Rattus tanezumi | 2014 | North      | Central Water Catchment | Urban        | Adult    | Male   |
| RT-27 | Rattus tanezumi | 2013 | North-East | Pulau Ubin              | Urban        | Adult    | Female |
| RT-28 | Rattus tanezumi | 2013 | North      | Central Water Catchment | Urban        | Adult    | Female |
| RT-29 | Rattus tanezumi | 2013 | North-East | Pulau Ubin              | Urban        | Juvenile | Male   |
| RT-30 | Rattus tanezumi | 2014 | North      | Central Water Catchment | Urban        | Adult    | Male   |
| RT-31 | Rattus tanezumi | 2014 | Central    | Bukit Timah             | Young Forest | Adult    | Male   |
| RT-32 | Rattus tanezumi | 2013 | North-East | Pulau Ubin              | Urban        | Adult    | Male   |
| MU-01 | Mus castaneus   | 2012 | North-East | Punggol                 | Scrub        | Adult    | Male   |
| MU-02 | Mus castaneus   | 2012 | North-East | Punggol                 | Scrub        | Adult    | Male   |
| MU-03 | Mus castaneus   | 2012 | North-East | Punggol                 | Scrub        | Juvenile | Female |
| MU-04 | Mus castaneus   | 2012 | North-East | Punggol                 | Scrub        | Adult    | Male   |
| MU-05 | Mus castaneus   | 2012 | North-East | Punggol                 | Scrub        | Adult    | Male   |
| MU-06 | Mus castaneus   | 2012 | Central    | Novena                  | Urban        | Adult    | Female |
| MU-07 | Mus castaneus   | 2012 | Central    | Geylang                 | Urban        | Juvenile | Female |
| MU-08 | Mus castaneus   | 2012 | North-East | Punggol                 | Scrub        | Adult    | Male   |
| MU-09 | Mus castaneus   | 2012 | North-East | Punggol                 | Scrub        | Juvenile | Male   |
| MU-10 | Mus castaneus   | 2012 | Central    | Outram                  | Urban        | Adult    | Male   |
| MU-11 | Mus castaneus   | 2012 | Central    | Rochor                  | Urban        | Adult    | Male   |
| MU-12 | Mus castaneus   | 2012 | Central    | Queenstown              | Young Forest | Adult    | Female |
| MU-13 | Mus castaneus   | 2012 | Central    | Queenstown              | Young Forest | Juvenile | Female |
| MU-14 | Mus castaneus   | 2012 | Central    | Queenstown              | Young Forest | Juvenile | Male   |
| MU-15 | Mus castaneus   | 2013 | North      | Central Water Catchment | Urban        | Adult    | Female |
| MU-16 | Mus castaneus   | 2013 | Central    | Bukit Timah             | Young Forest | Adult    | Female |
| MU-17 | Mus castaneus   | 2013 | North      | Central Water Catchment | Urban        | Adult    | Male   |
| MU-18 | Mus castaneus   | 2014 | North      | Central Water Catchment | Urban        | Adult    | Male   |
| MU-19 | Mus castaneus   | 2014 | North      | Central Water Catchment | Urban        | Adult    | Female |
| MU-20 | Mus castaneus   | 2015 | North      | Central Water Catchment | Urban        | Adult    | Male   |
| MU-21 | Mus castaneus   | 2015 | East       | Pasir Ris               | Urban        | Adult    | Male   |
