# Supplementary material for: Evolution and ecology of Jeilongvirus among wild rodents and shrews in Singapore
Source: PubMed Central journal article supplement (PMC10726567; doi:10.1186/s42522-023-00094-1), 2023-12-18
Supplement: 42522_2023_94_MOESM3_ESM.pdf [file 42522_2023_94_MOESM3_ESM.pdf]

**Additional Table 2.** NGS reads obtained from full genome sequencing of RT5, 7 and 8.

| <b>Sample ID</b> | <b>Species</b>  | <b>Tissue</b> | <b># of raw reads</b> | <b># of trimmed reads</b> | <b># of mapped reads (to Reference Genome)</b> | <b>mapped reads /trimmed reads (%)</b> | <b>Genome Coverage (%)</b> | <b>Depth</b> |
|------------------|-----------------|---------------|-----------------------|---------------------------|------------------------------------------------|----------------------------------------|----------------------------|--------------|
| RT-05            | Rattus tanezumi | Kidney        | 783, 652              | 733, 254                  | 11, 950                                        | 1.6297                                 | 99.97                      | 234          |
| RT-07            | Rattus tanezumi | Kidney        | 1, 737, 634           | 1, 640, 416               | 101, 609                                       | 6.1941                                 | 99.99                      | 1, 662       |
| RT-08            | Rattus tanezumi | Kidney        | 73, 938               | 61, 494                   | 14, 412                                        | 23.4364                                | 99.2                       | 391          |
